# Supplementary material
Source: PubMed Central journal article supplement (PMC9135940)

Supplementary Figure 1. Different characteristics of participants in Control and ESRD groups. Chi-square test of independence with Yates correction was performed to test whether the group (Control or ESRD) and current characteristic variable are related or independent. (a) Smoking status; (b) Insomnia; (c) Regular nutrition; (d) Alcohol consumption; (e) Marital status; (f) Currently working. Significant differences between groups in nutrition and employment status are explained by physiological reasons and the specific nature of the hemodialysis procedure, which makes it impossible to eat regularly. In addition, many patients are disabled and unable to work at present.

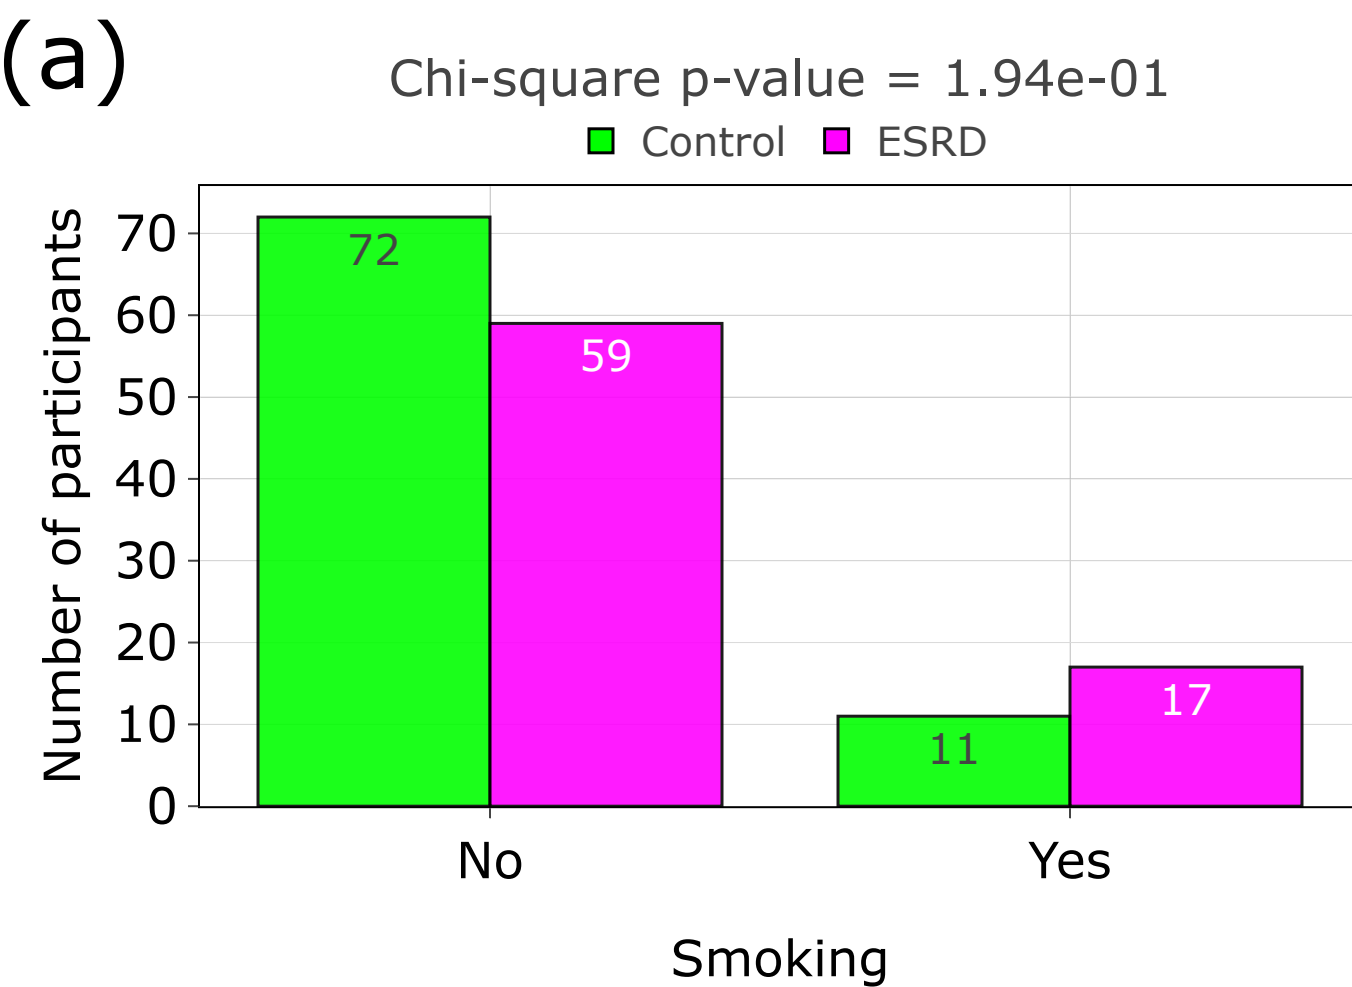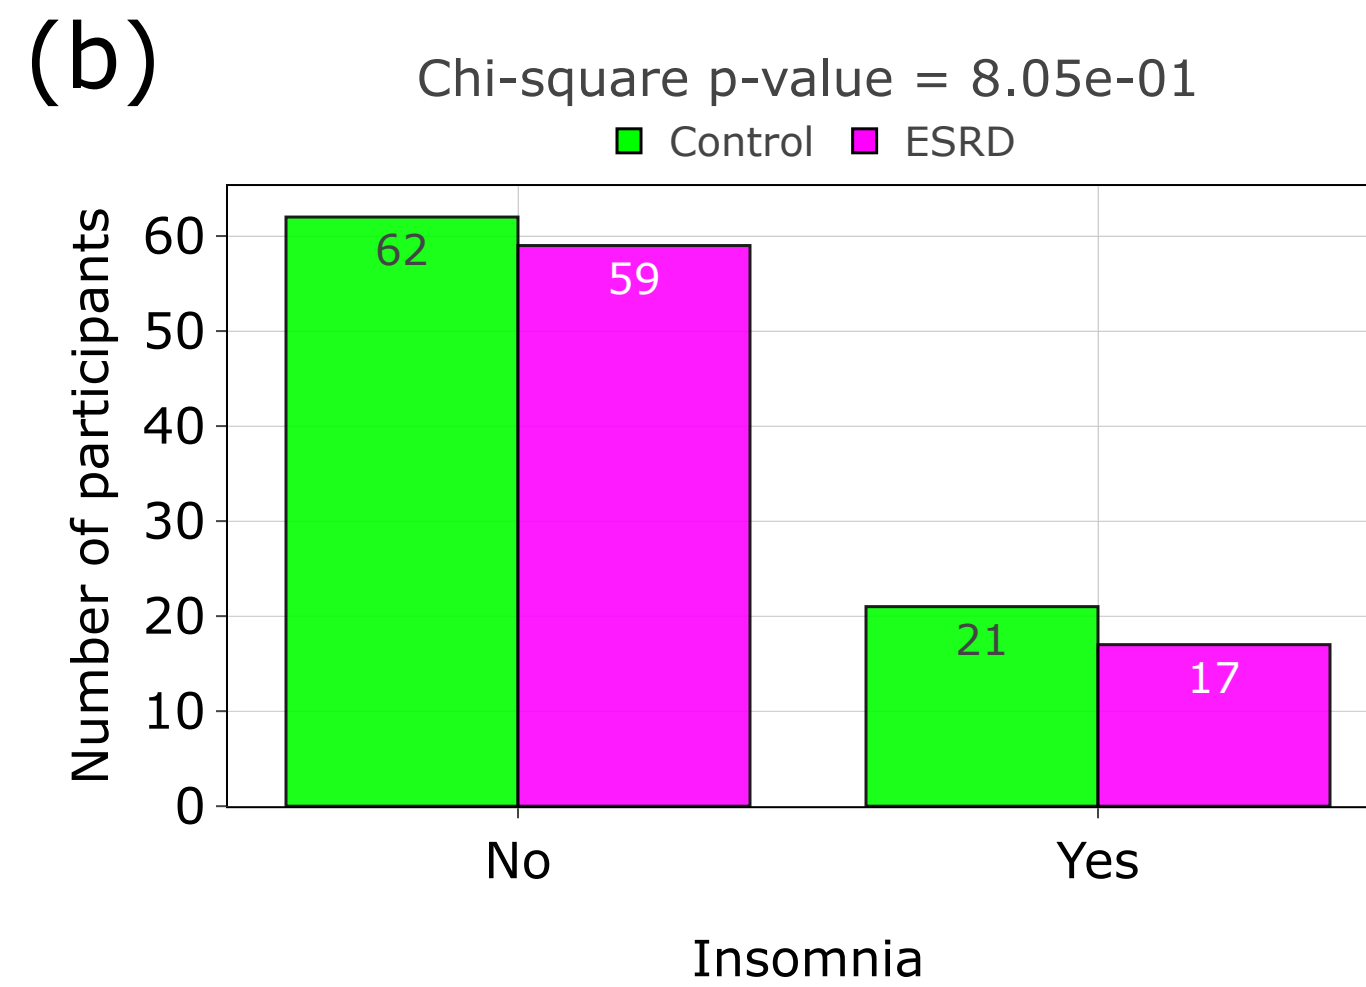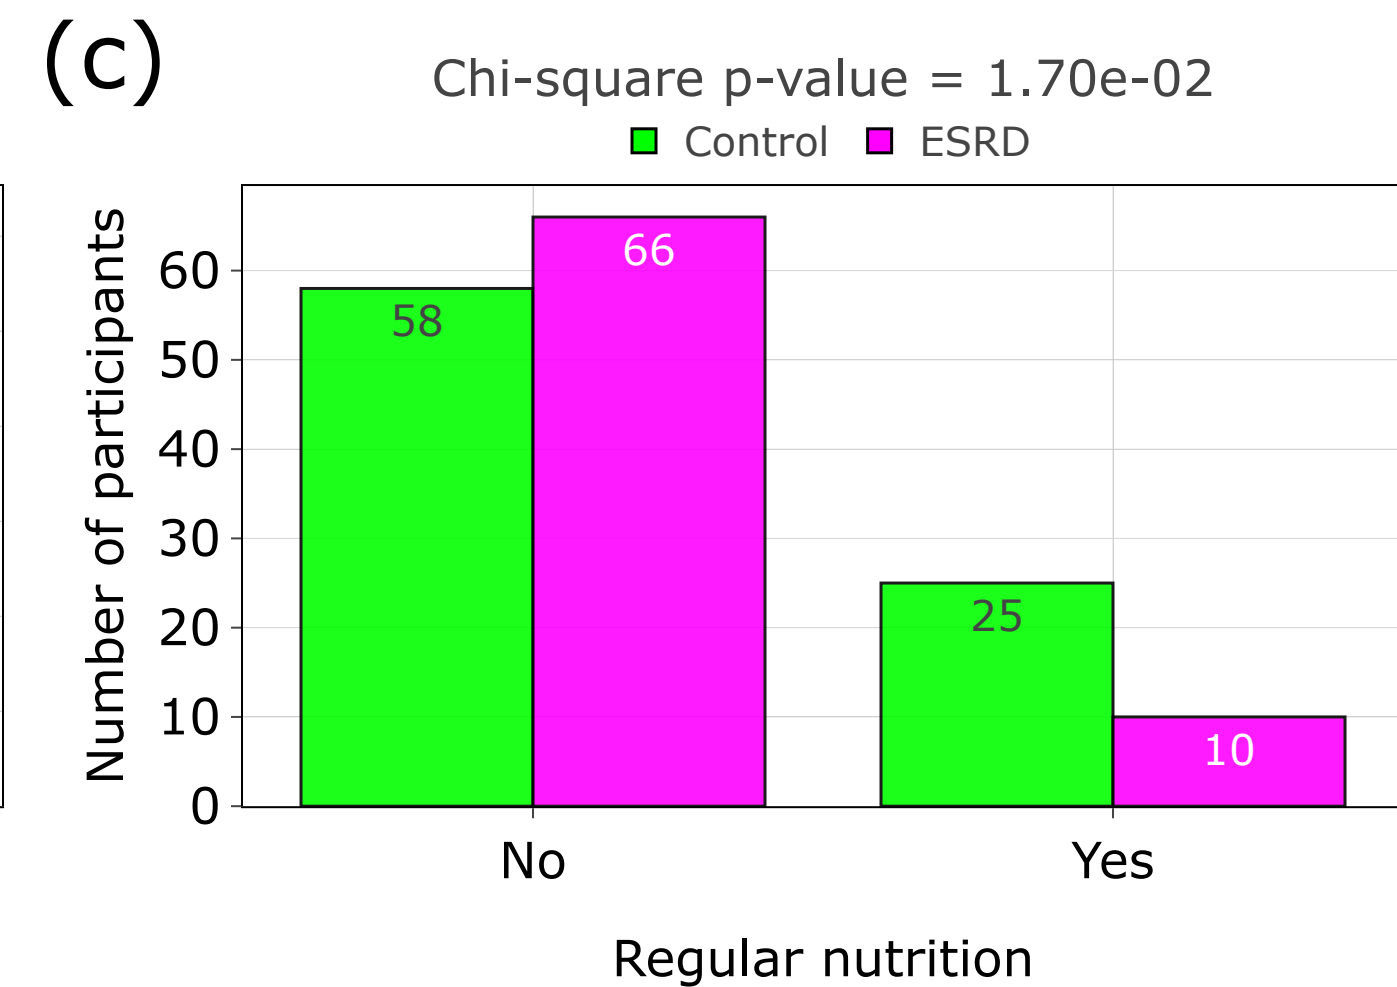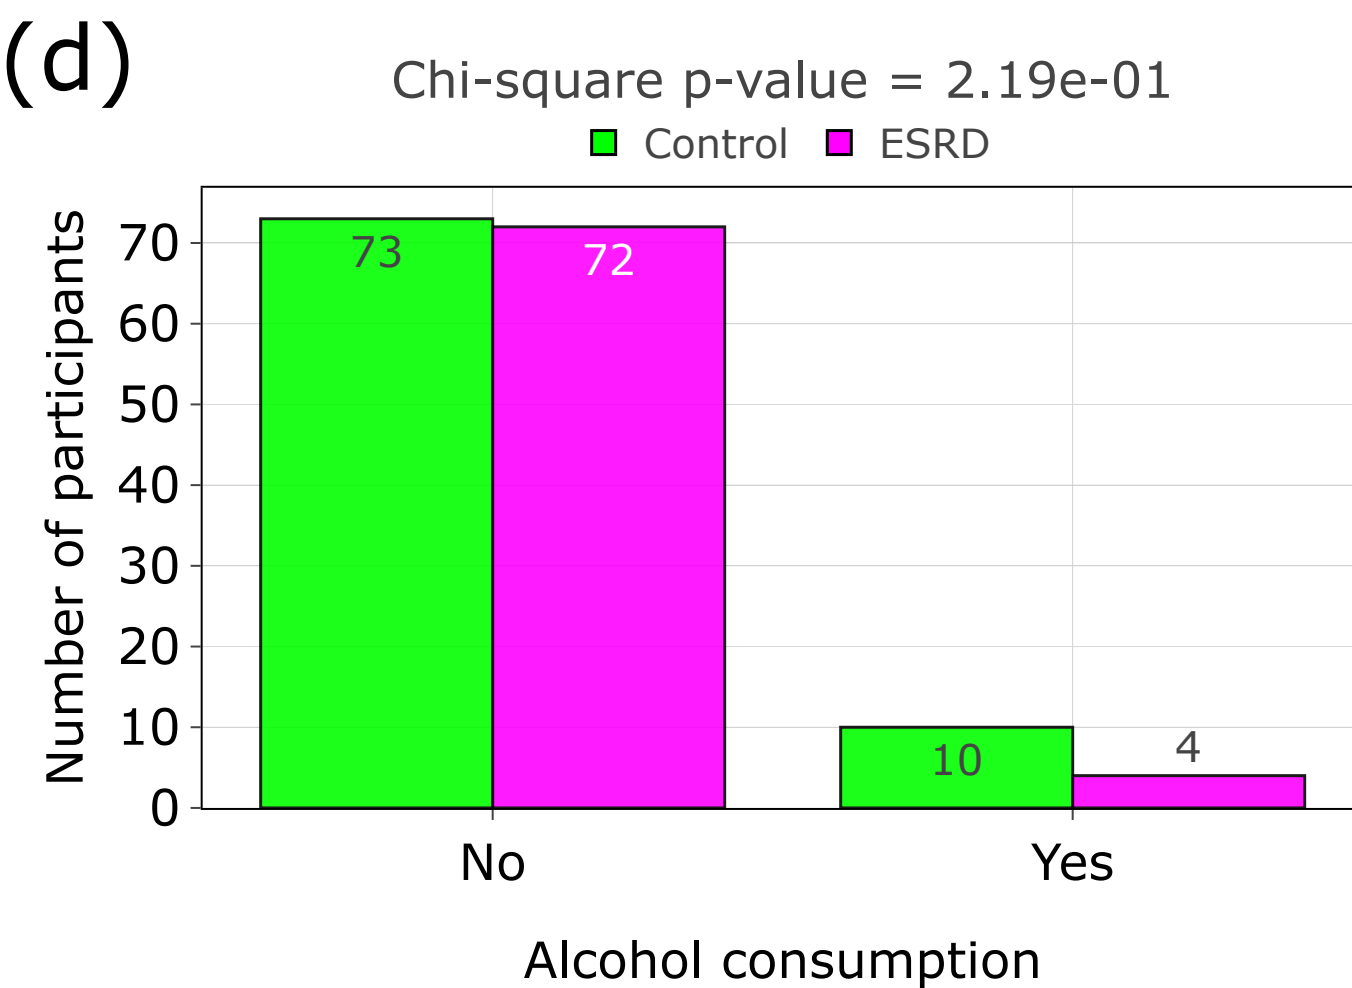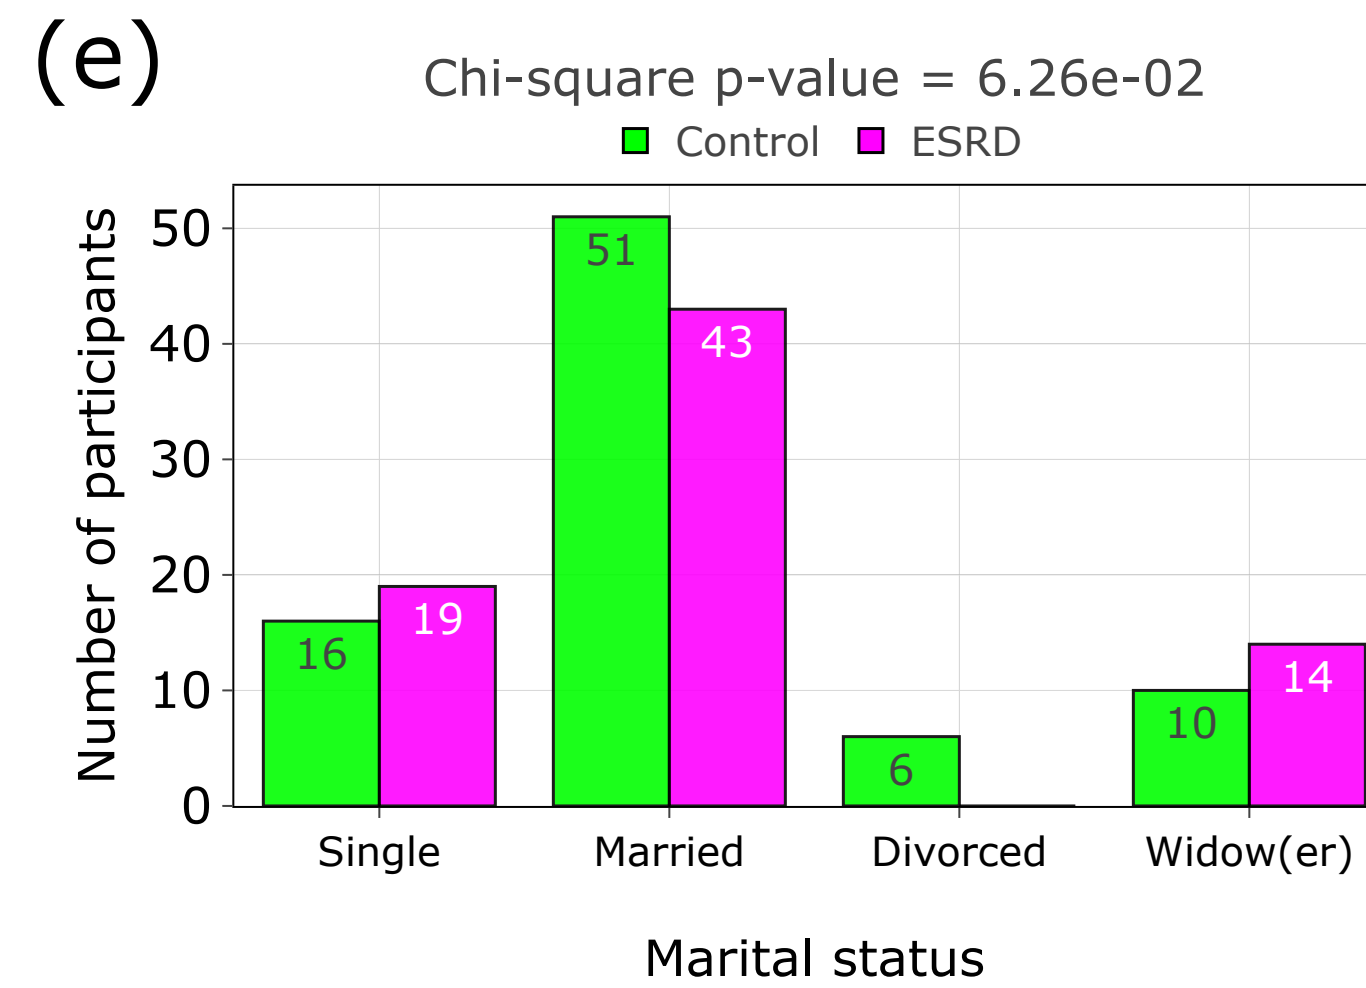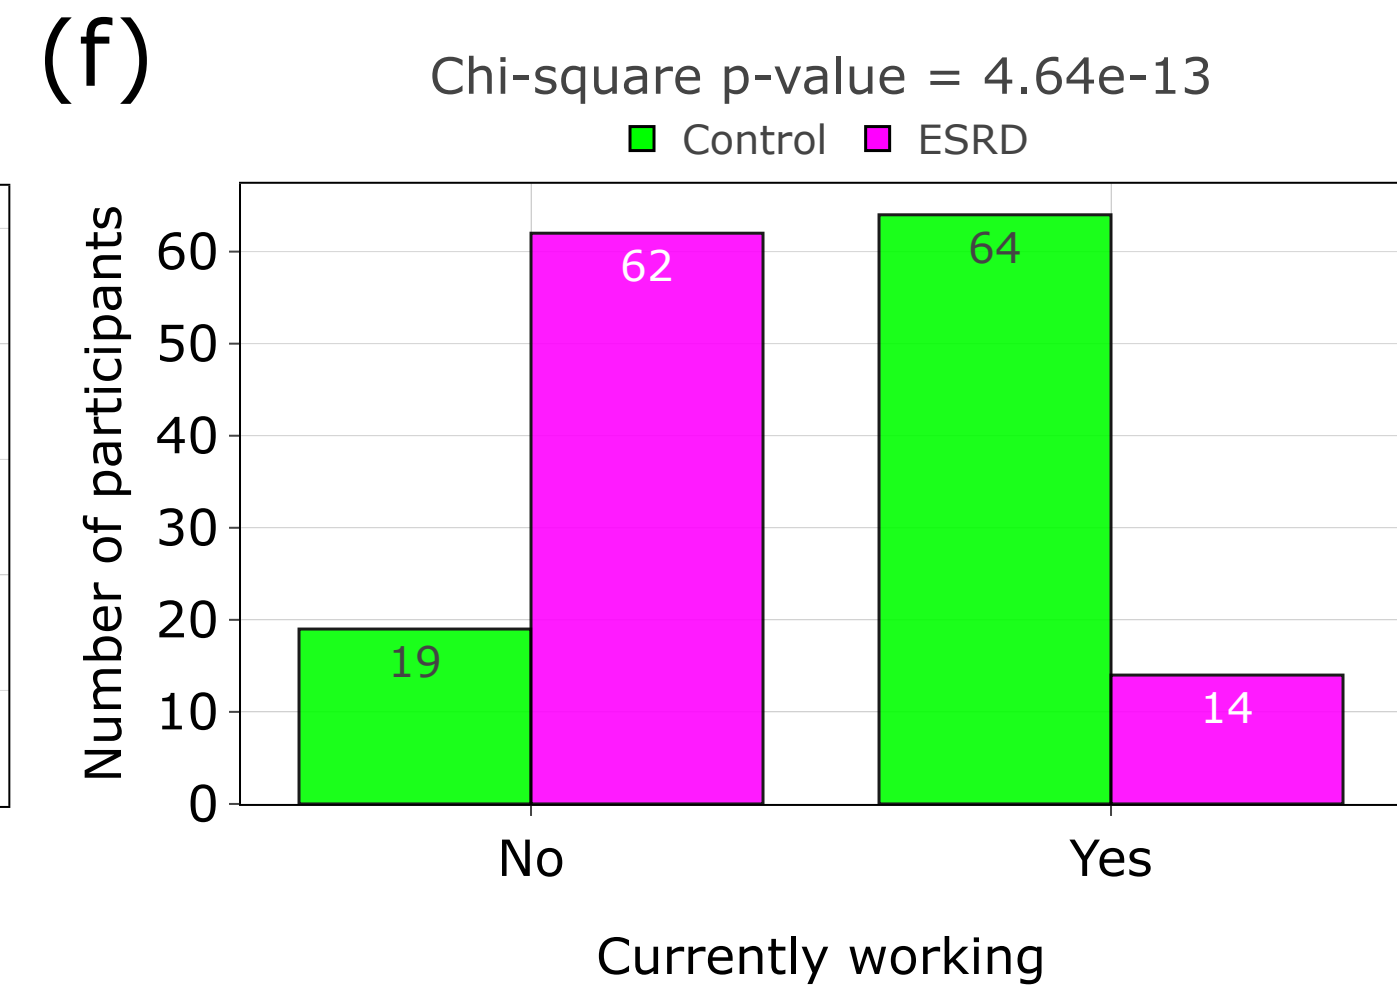

Supplement: 11357_2022_540_MOESM1_ESM.pdf [file 11357_2022_540_MOESM1_ESM.pdf]
