# Supplementary material
Source: PubMed Central journal article supplement (PMC9135940)

Supplementary Figure 2. The dialysis effect on the values of blood biochemistry parameters, which were used to calculate the Phenotypic Age: (a) White blood cell count ( $10^9/L$ ); (b) Mean cell volume (fL); (c) Red cell distribution width (%); (d) Lymphocyte percent (%); (e) Albumin (g/L); (f) Glucose. serum (mmol/L); (g) Creatinine ( $\mu\text{mol/L}$ ); (h) Alkaline phosphatase (U/L); (i) Log C-reactive protein (mg/L); (j) Phenotypic Age. Data are presented for five subjects (H1, H2, H3, H4, H5) outside the main dataset. Biomarker values for these subjects are available in Supplementary Table 5.

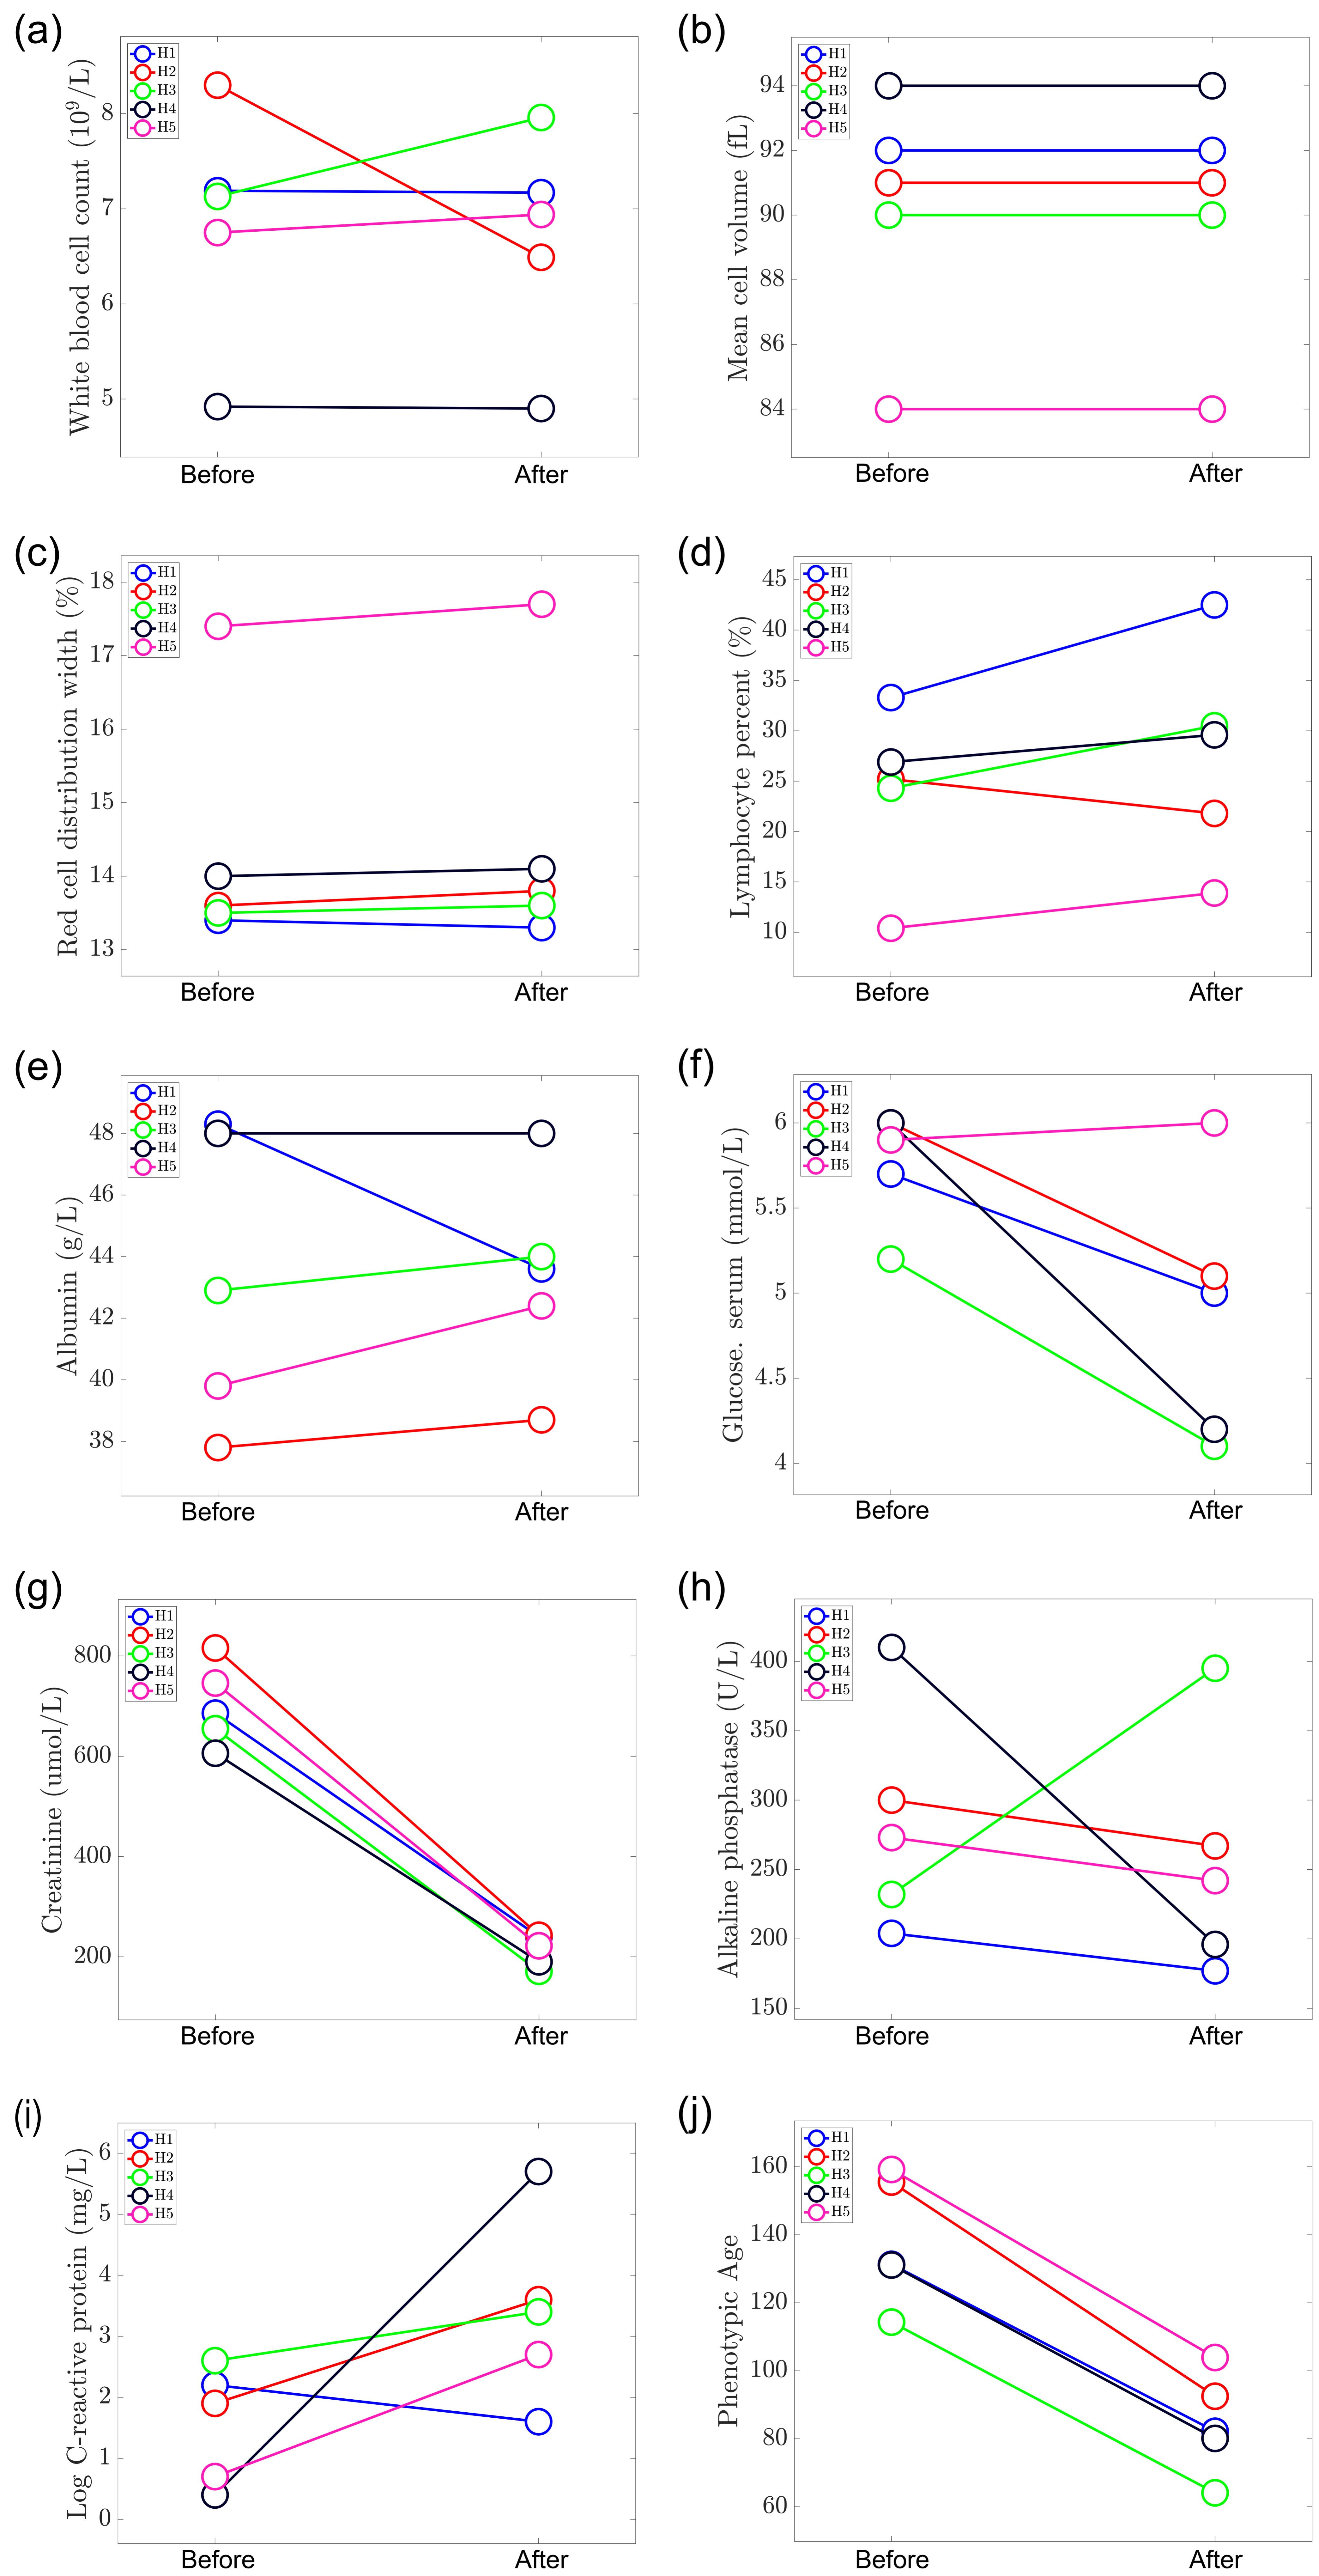

Supplement: 11357_2022_540_MOESM2_ESM.pdf [file 11357_2022_540_MOESM2_ESM.pdf]
