# Supplementary material
Source: PubMed Central journal article supplement (PMC9135940)

Supplementary Figure 3. The distributions of blood cell count, obtained from Horvath's calculator in Control and ESRD groups: (a) CD4+ T cells; (b) naïve CD8+ T cells; (c) exhausted CD8+ T cells; (d) granulocytes; (e) monocytes; (f) natural killer cells; (g) plasma B cells. Statistical difference between the group was determined with Mann–Whitney U test p-value (FDR-corrected).

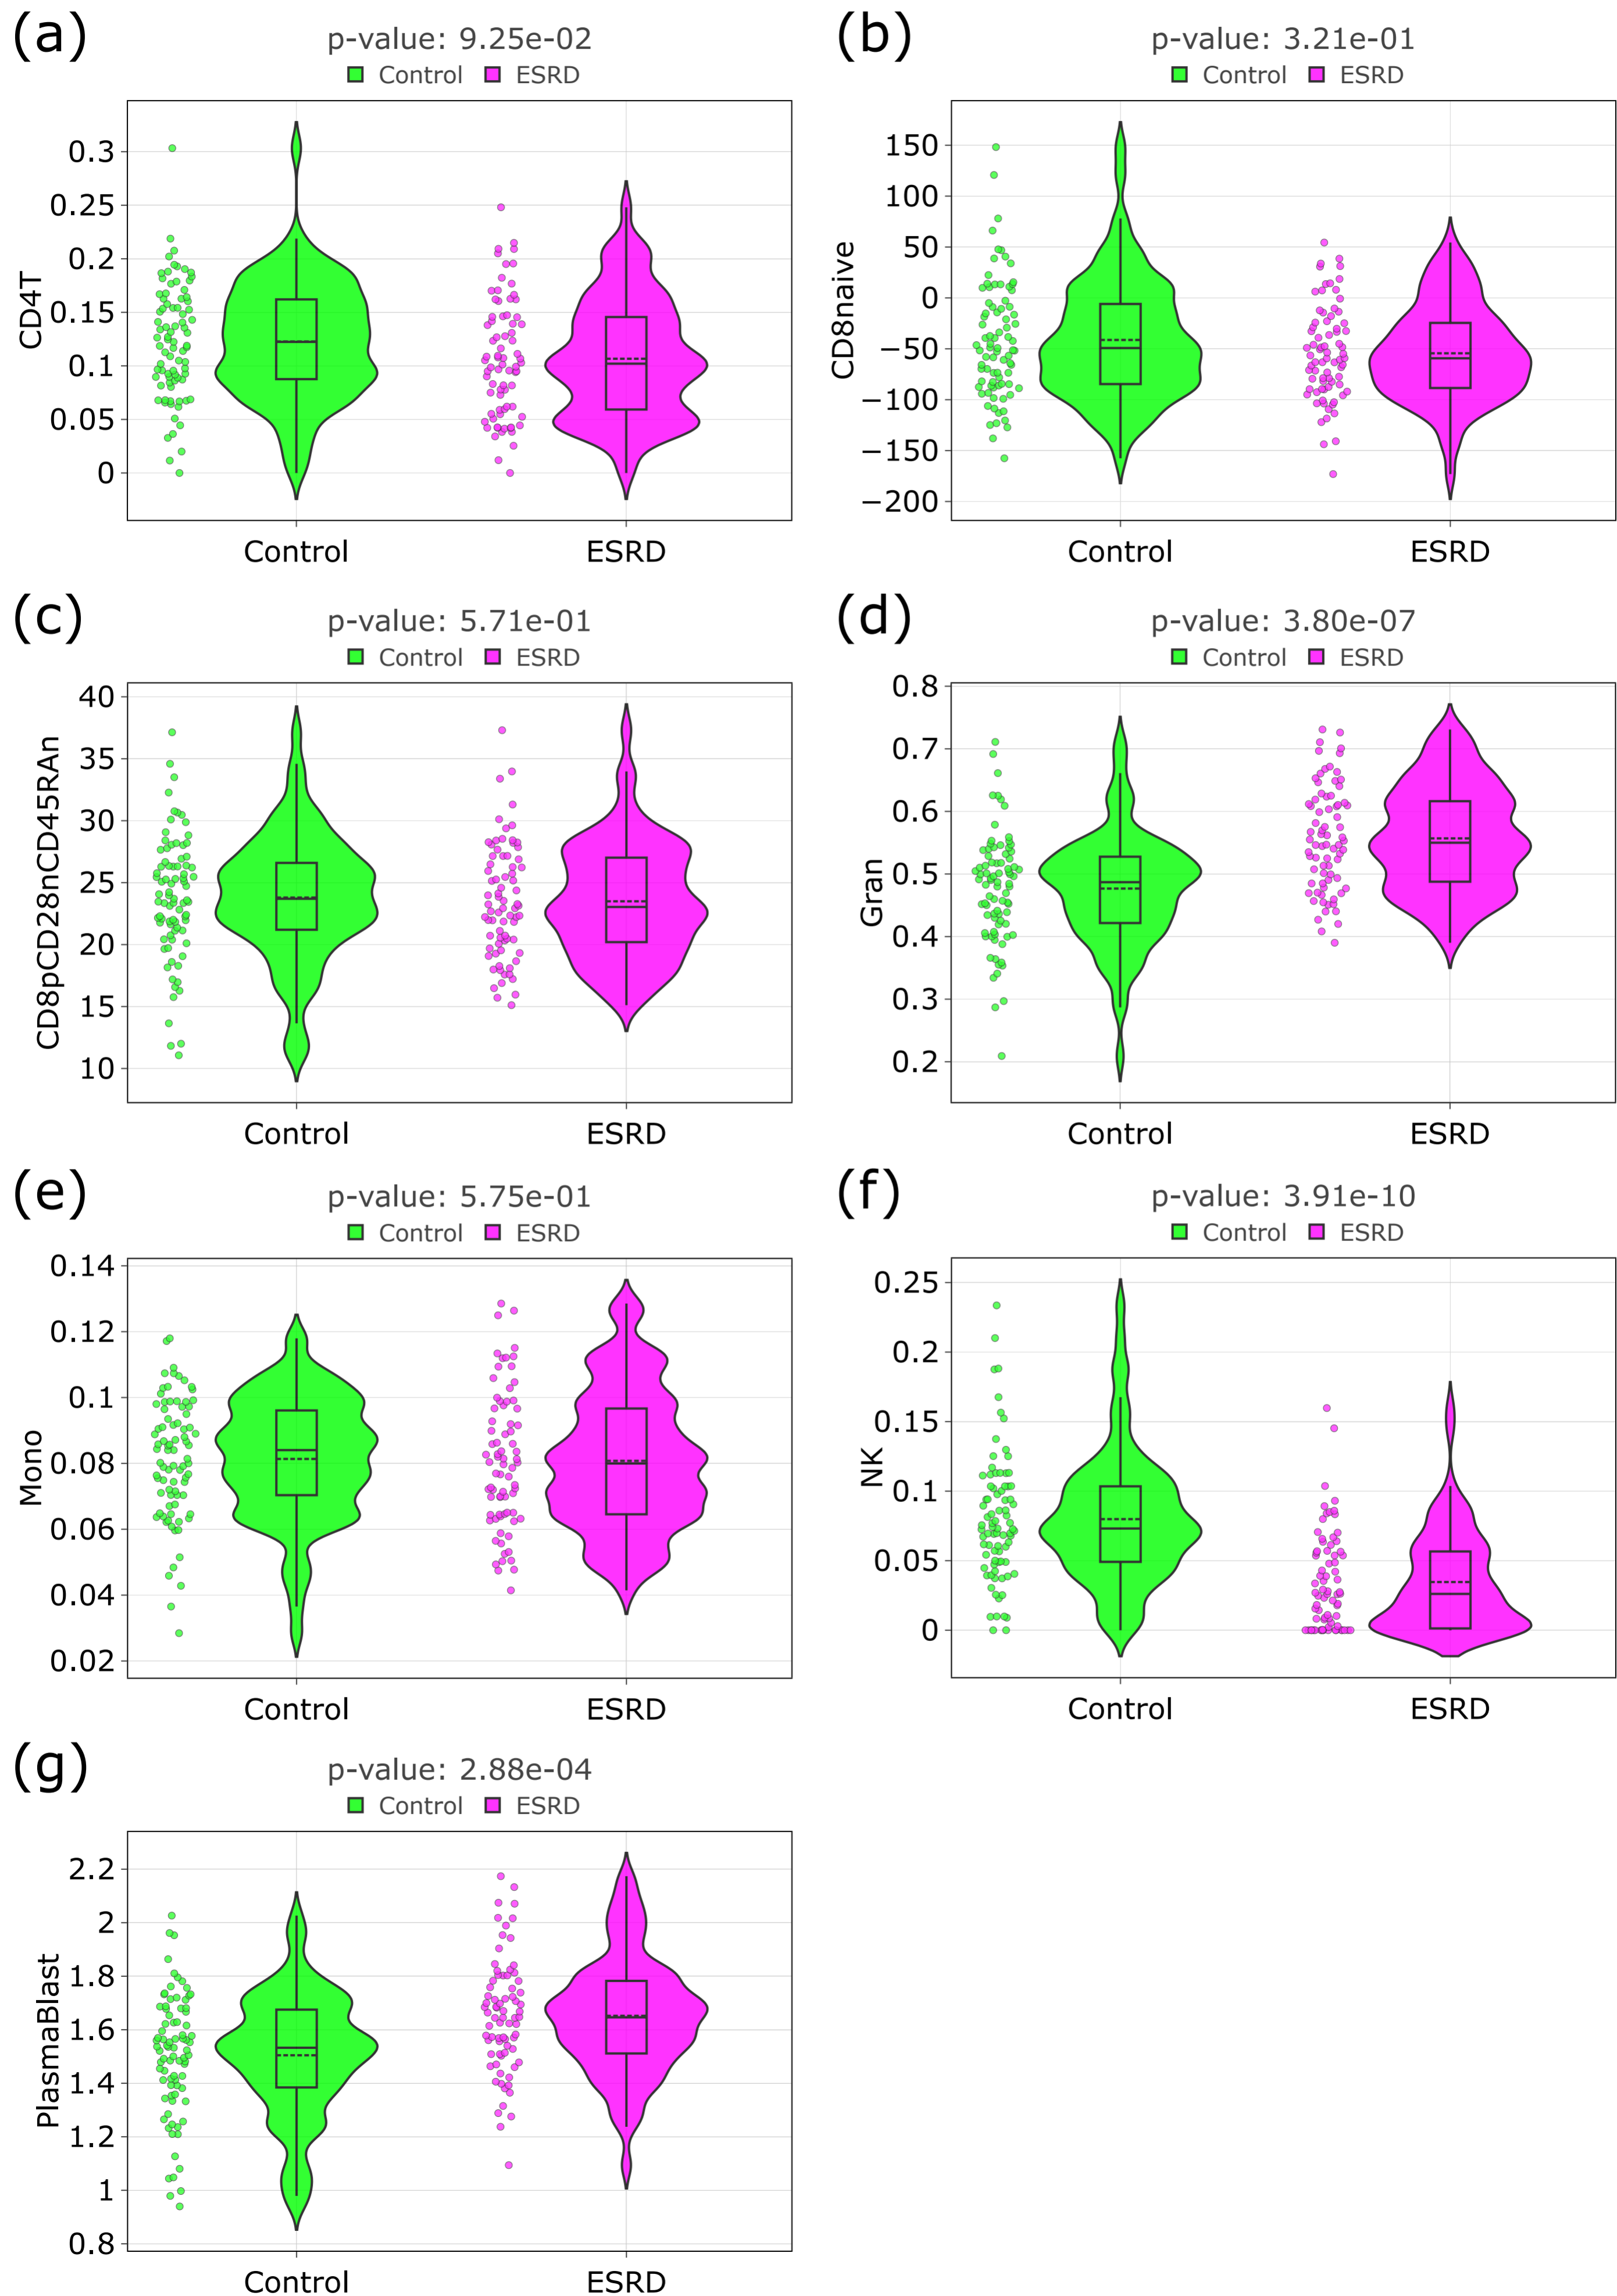

Supplement: 11357_2022_540_MOESM3_ESM.pdf [file 11357_2022_540_MOESM3_ESM.pdf]
