# Supplementary material
Source: PubMed Central journal article supplement (PMC9135940)

Supplementary Figure 4. Characteristics of the modified ipAGE model (sex was considered as covariate in Elastic Net).

(a) Association between ipAGE and chronological age; (b) ipAGE acceleration in controls, test controls, and participants with the ESRD. ipAGE was built with the Elastic Net regression model where chronological age was regressed on Multiplex biomarkers. Age acceleration was calculated as a residual from the linear regression model which estimates chronological age only on controls (green line). Mann–Whitney U test was applied to analyze the pairwise statistically significant difference of ipAGE acceleration between the groups of controls, test controls, and participants with ESRD.

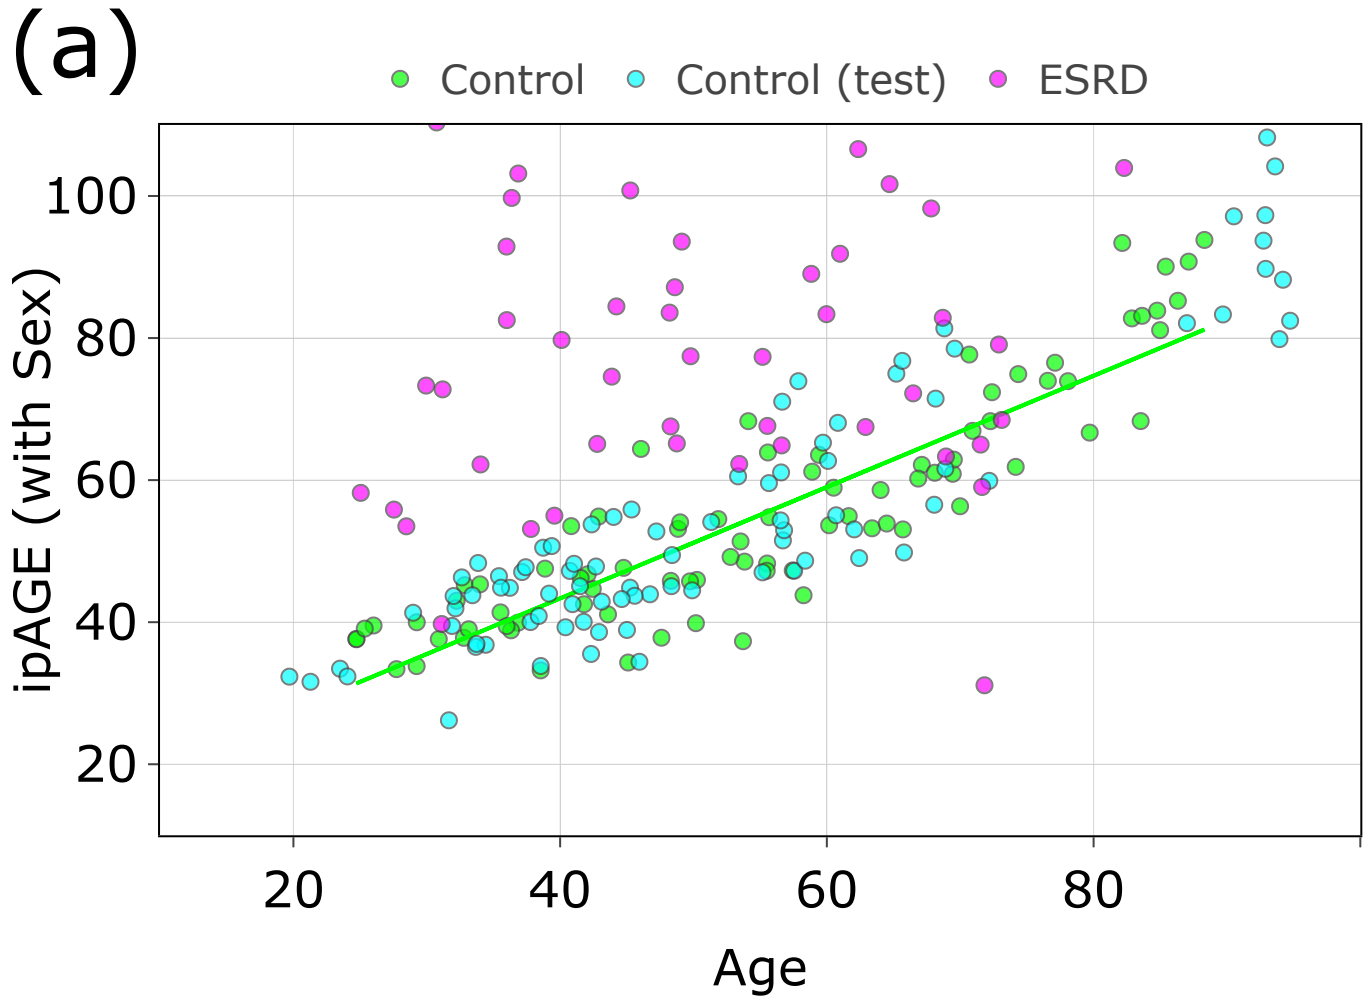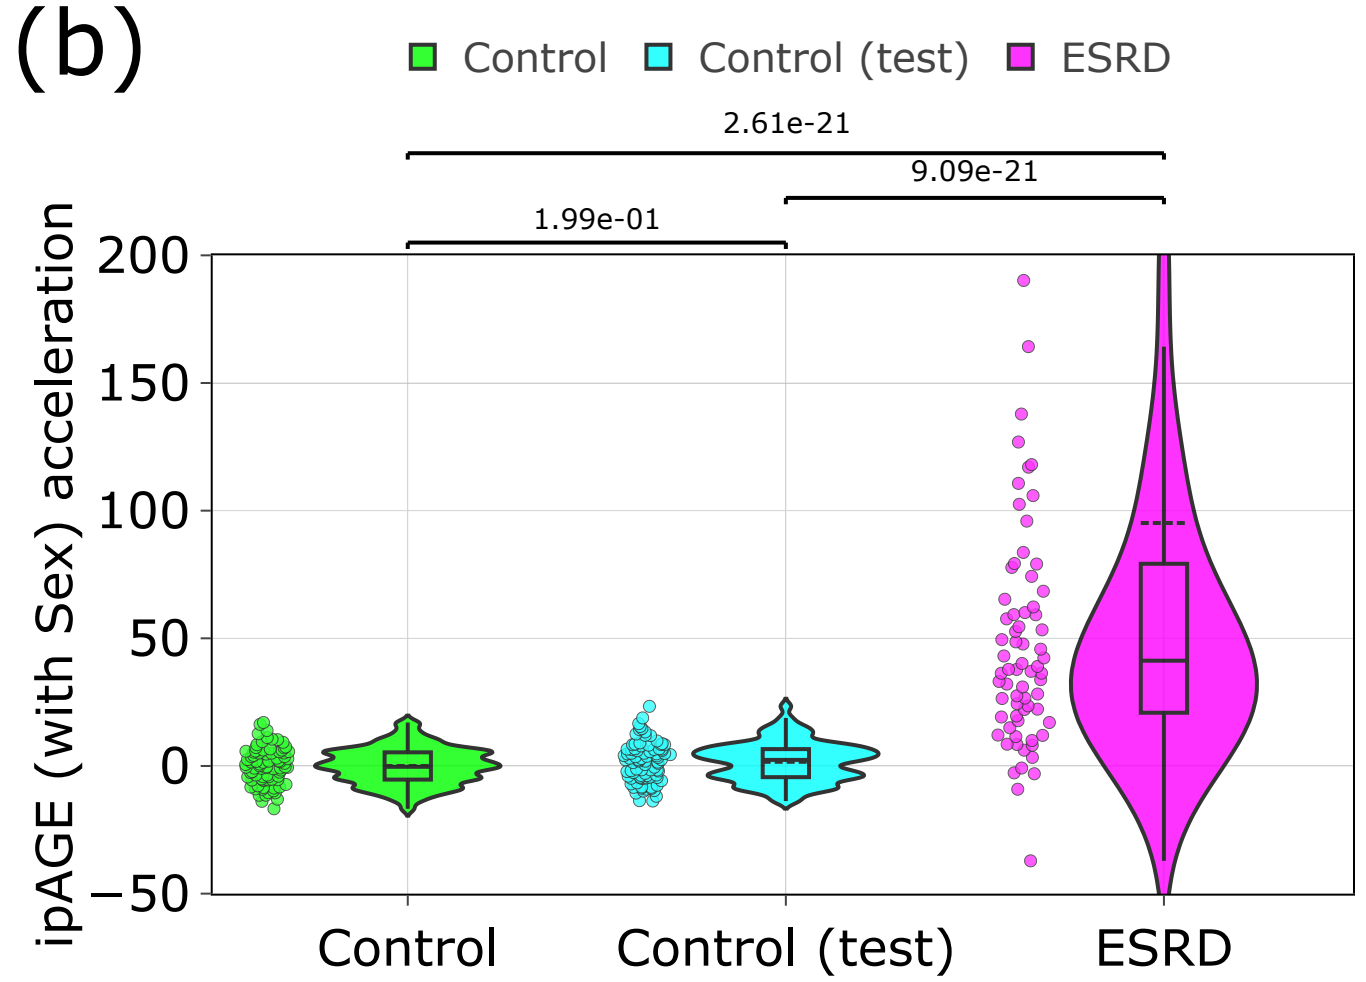

Supplement: 11357_2022_540_MOESM4_ESM.pdf [file 11357_2022_540_MOESM4_ESM.pdf]
