# Supplementary material
Source: PubMed Central journal article supplement (PMC9135940)

Supplementary Figure 5. Association of inflammatory/immunological proteins with different types of age acceleration. (a) Pearson correlation coefficients and corresponding FDR-corrected p-values resulting from the correlation of protein levels and each type of age-acceleration, in the control and (b) ESRD groups. (c) Table with the number of proteins significantly associated with different types of age acceleration (FDR-corrected Pearson correlation p-value below 0.05). (d) Venn diagram of ESRD-associated, chronological age-associated inflammatory/immunological proteins in the control group and ipAGE acceleration associated in ESRD group. (e) Association between CXCL9 and ipAGE acceleration.

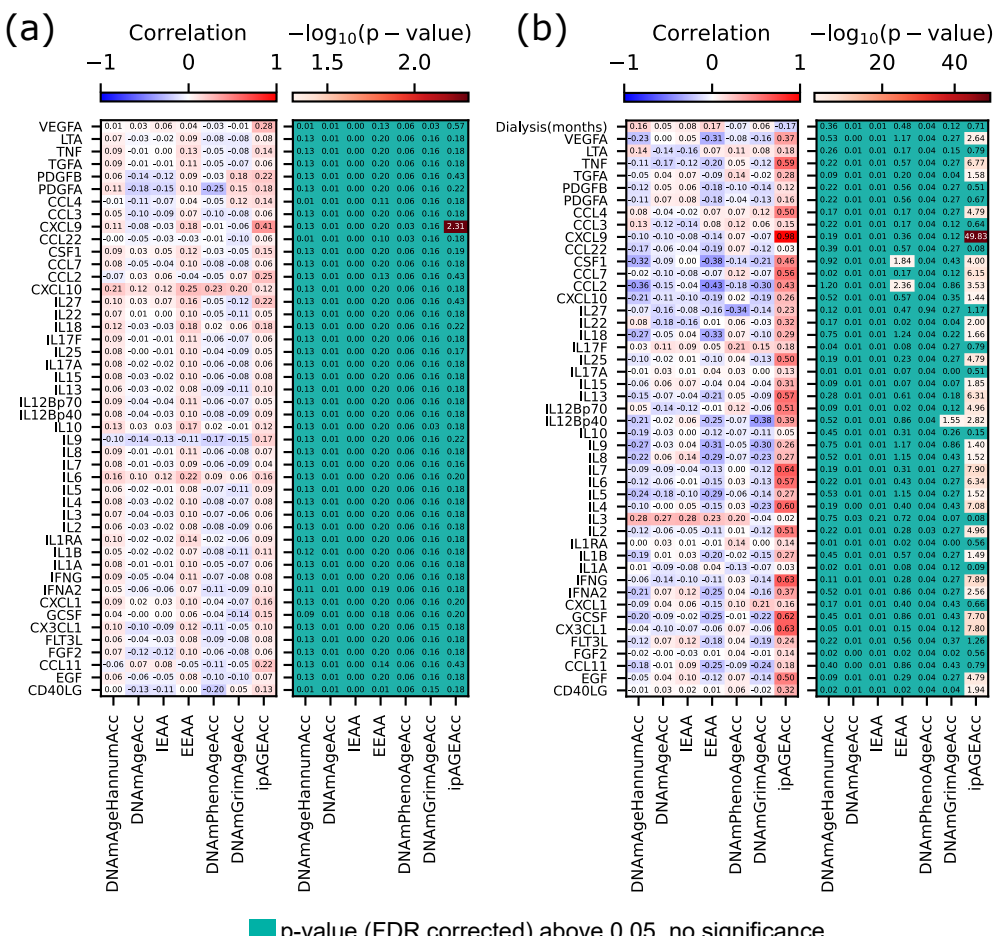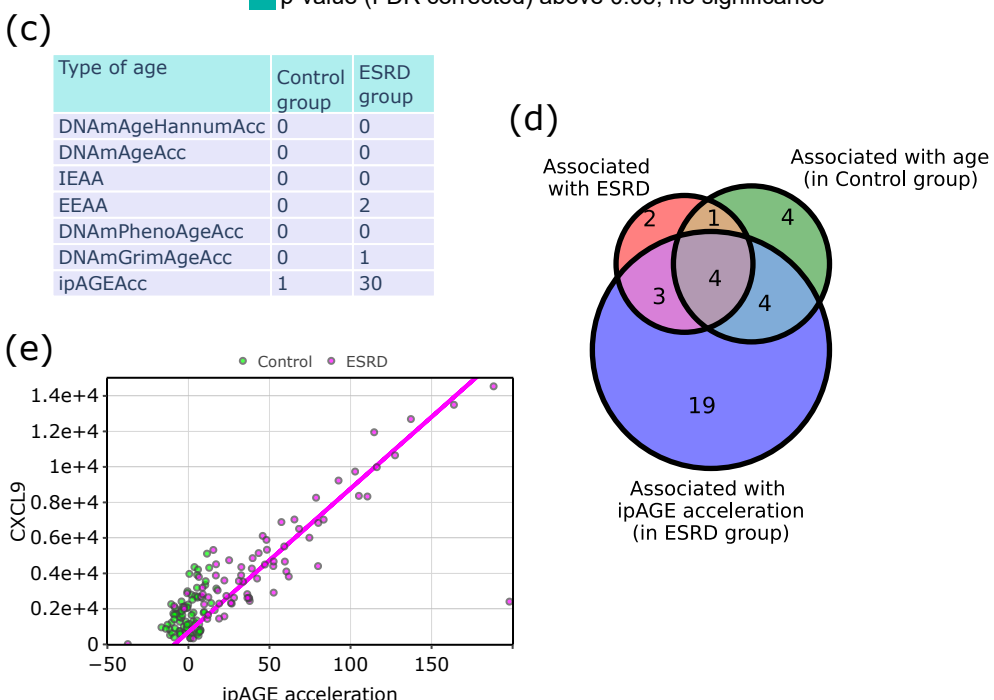

Supplement: 11357_2022_540_MOESM5_ESM.pdf [file 11357_2022_540_MOESM5_ESM.pdf]
