# Supplementary material
Source: PubMed Central journal article supplement (PMC9135940)

Supplementary Figure 7. Dependence of inflammatory/immunological biomarkers on ipAGE.

● Control ● ESRD

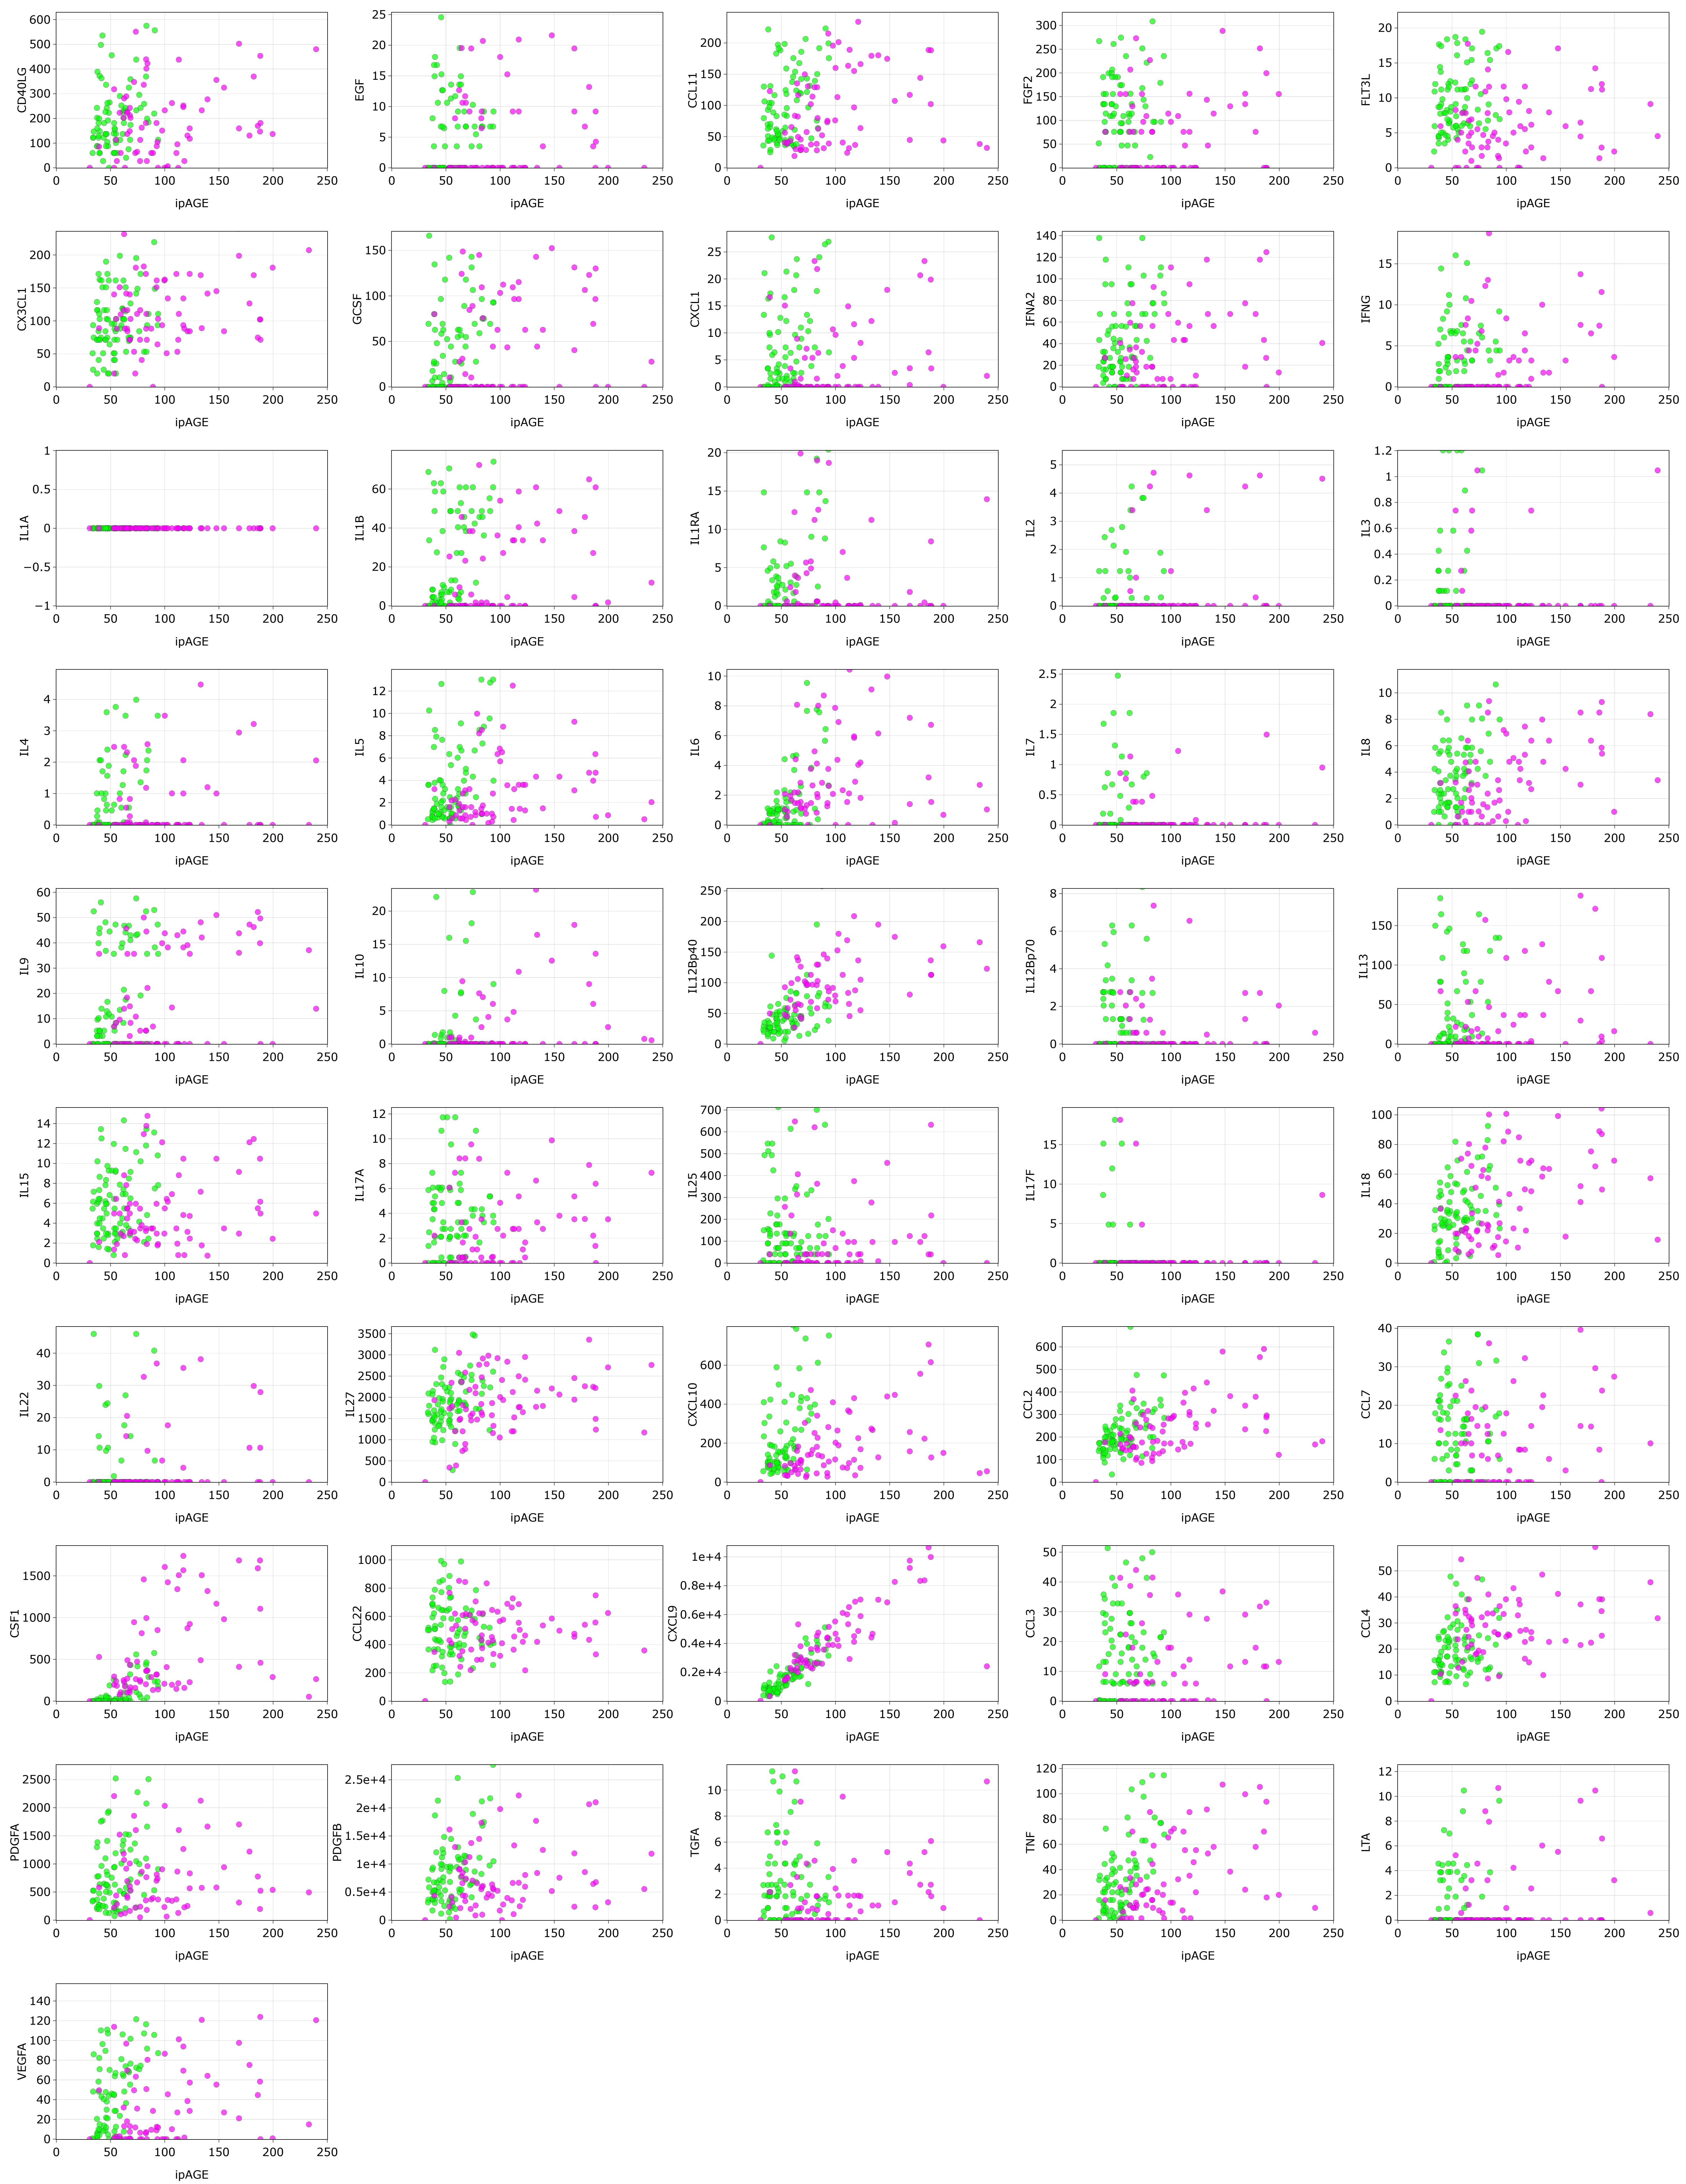

Supplement: 11357_2022_540_MOESM7_ESM.pdf [file 11357_2022_540_MOESM7_ESM.pdf]
