# Supplementary material
Source: PubMed Central journal article supplement (PMC9135940)
Supplement: 11357_2022_540_MOESM9_ESM.pdf [file 11357_2022_540_MOESM9_ESM.pdf]

Supplementary Figure 9. Pearson correlation coefficients and corresponding FDR-corrected p-values resulting from the correlation between all immunological biomarkers: (a) in Control group; (b) in ESRD group.

(a)

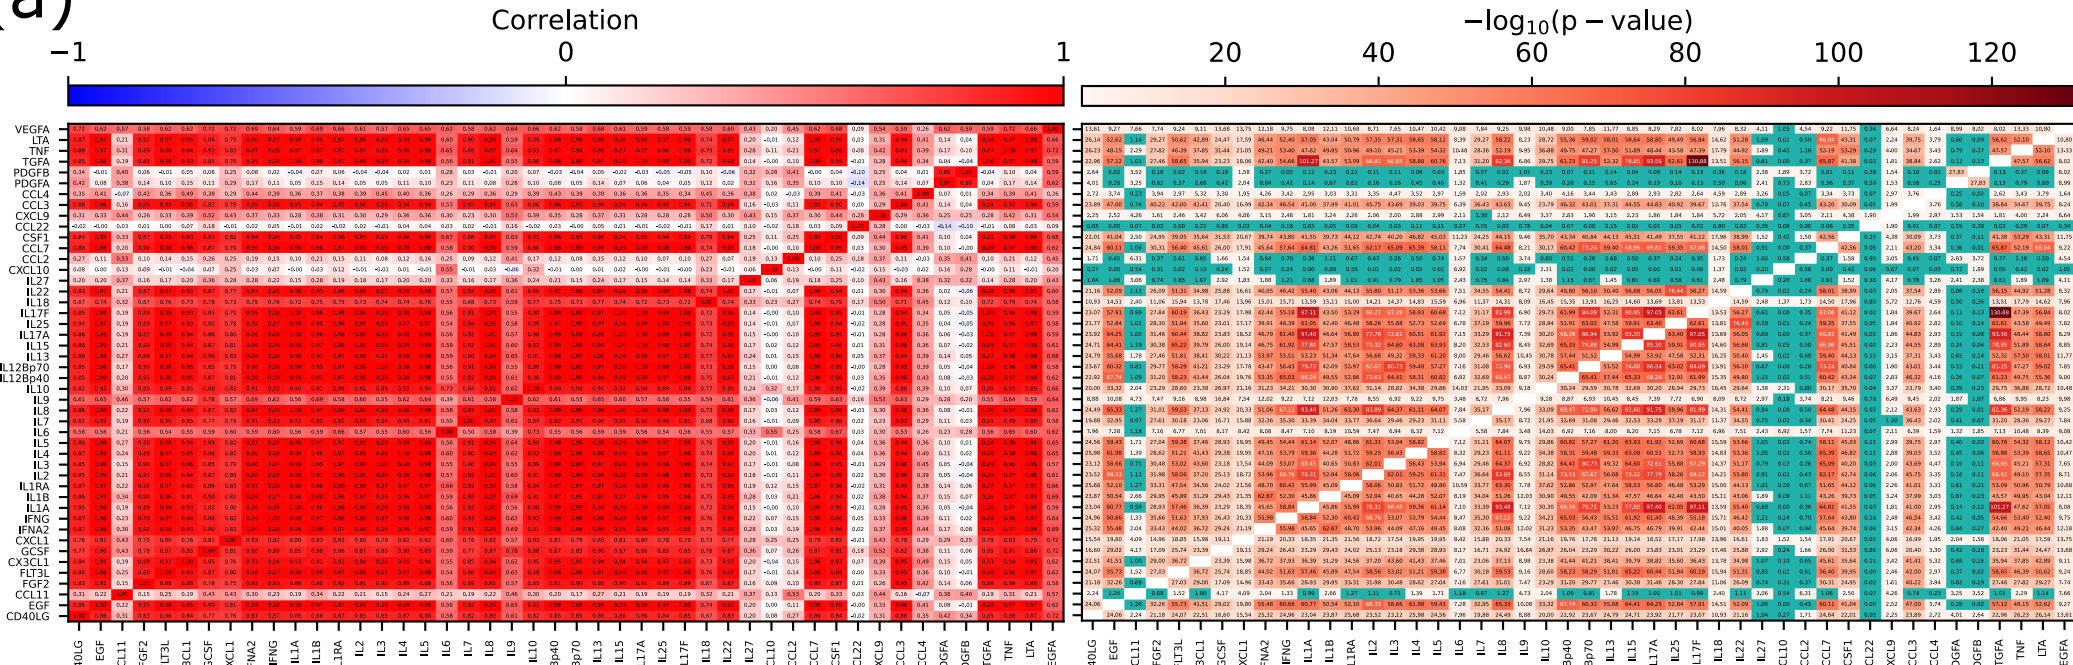

(b)

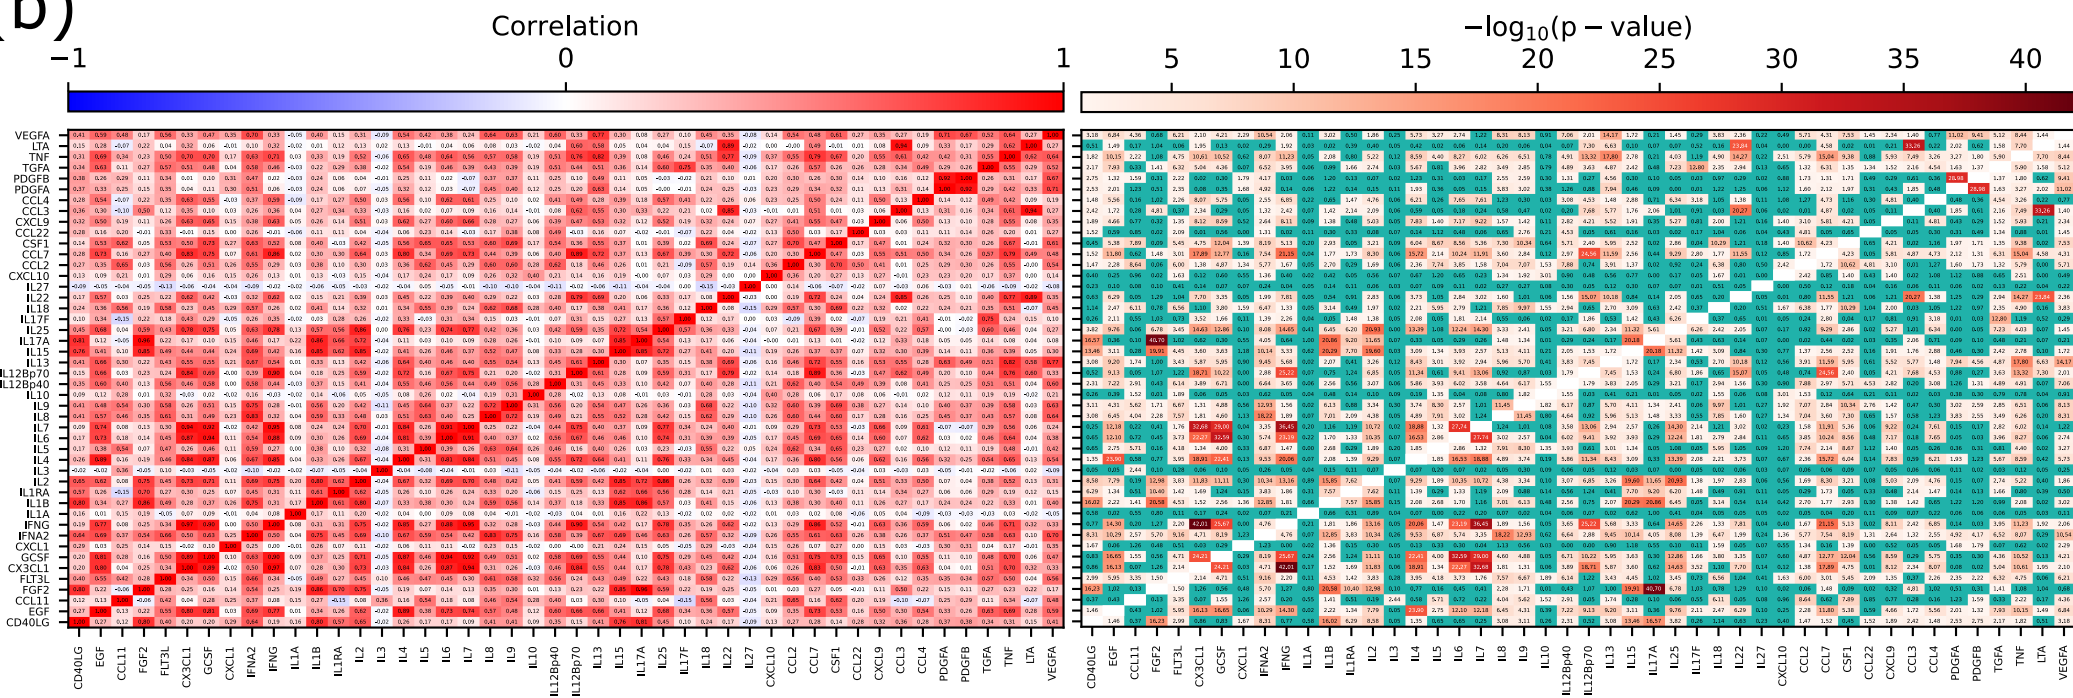

p-value (FDR corrected) above 0.05, no significance
