# Supplementary material
Source: PubMed Central journal article supplement (PMC9135940)
Supplement: 11357_2022_540_MOESM20_ESM.pdf [file 11357_2022_540_MOESM20_ESM.pdf]

Supplementary Table 11. Eight biomarkers which are associated with all types of ages

| <b>Biomarker</b> | <b>Name</b>                                                                  | <b>Role of inflammation</b>                                                                                              | <b>Age-association</b>                                                                                                                |
|------------------|------------------------------------------------------------------------------|--------------------------------------------------------------------------------------------------------------------------|---------------------------------------------------------------------------------------------------------------------------------------|
| <b>CXCL9</b>     | Chemokine (C-X-C motif) ligand 9, Monokine induced by gamma interferon (MIG) | Proinflammatory chemokine → Th1 recruitment                                                                              | Increases with age <sup>1,2</sup><br>Inflammaging <sup>3</sup><br>CVDs <sup>4</sup>                                                   |
| <b>VEGFA</b>     | Vascular endothelial growth factor A                                         | Stimulation of migration of monocytes                                                                                    | Decreased angiogenesis <sup>5</sup>                                                                                                   |
| <b>CCL2</b>      | C-C motif ligand 2, Monocyte Chemoattractant Protein 1 (MCP-1)               | The strongest factor in attracting monocytes                                                                             | Increases with age <sup>6</sup><br>Osteoarthritis <sup>7,8</sup><br>Alzheimer's disease <sup>9</sup><br>CVDs <sup>10</sup>            |
|                  |                                                                              | Egress and migration of cells from the hematopoietic organs                                                              |                                                                                                                                       |
| <b>IL27</b>      | Interleukin 27                                                               | Anti-inflammatory → IL10↑                                                                                                | Violation of the mechanisms of anti-inflammatory action with age <sup>11</sup>                                                        |
|                  |                                                                              | Expressed by antigen presenting cells → induces differentiation of the diverse populations of T cells                    |                                                                                                                                       |
| <b>CCL11</b>     | C-C motif chemokine 11, Eosinophil chemotactic protein and eotaxin-1         | Eosinophil recruitment → allergic responses                                                                              | Increases with age <sup>12</sup><br>Suppresses neurogenesis <sup>13</sup><br>Stimulates neurodegeneration and dementia <sup>12</sup>  |
| <b>PDGFB</b>     | Platelet-derived growth factor subunit B                                     | No information                                                                                                           | Neutralization of neurotoxins<br>Functioning of the blood-brain barrier <sup>14</sup><br>Stimulating osteoblastogenesis <sup>15</sup> |
| <b>IL18</b>      | Interleukin 18, Interferon-gamma inducing factor                             | Acts on CD4, CD8 T cells and NK cells to induce IFN $\gamma$ production, type II interferon → Activating the macrophages | Oncology <sup>16,17</sup><br>Atherosclerosis <sup>18</sup><br>Metabolic syndrome <sup>19</sup><br>Allergy <sup>18</sup>               |
|                  |                                                                              | Differentiation of naive T cells into Th2 cells                                                                          |                                                                                                                                       |
|                  |                                                                              | Stimulates mast cells and basophils                                                                                      |                                                                                                                                       |
|                  |                                                                              | Activating apoptosis                                                                                                     |                                                                                                                                       |

|            |               |                                                  |                                                                                                            |
|------------|---------------|--------------------------------------------------|------------------------------------------------------------------------------------------------------------|
| <b>IL6</b> | Interleukin 6 | Acute phase protein                              | Increases with age <sup>20</sup><br>Atherosclerosis <sup>21</sup><br>CVDs<br>Inflammaging <sup>20,22</sup> |
|            |               | The production of neutrophils in the bone marrow |                                                                                                            |
|            |               | The growth of B cells                            |                                                                                                            |

## References

1. Larsson A, Carlsson L, Gordh T, Lind AL, Thulin M, Kamali-Moghaddam M. The effects of age and gender on plasma levels of 63 cytokines. *J Immunol Methods*. 2015;425:58-61. doi:10.1016/j.jim.2015.06.009
2. Shurin GV, Yurkovetsky ZR, Chatta GS, Tourkova IL, Shurin MR, Lokshin AE. Dynamic alteration of soluble serum biomarkers in healthy aging. *Cytokine*. 2007;39(2):123-129. doi:10.1016/j.cyto.2007.06.006
3. Torres KCL, Rezende VB de, Lima-Silva ML, et al. Immune senescence and biomarkers profile of Bambuí aged population-based cohort. *Exp Gerontol*. 2018;103:47-56. doi:10.1016/j.exger.2017.12.006
4. Altara R, Gu YM, Struijker-Boudier HAJ, Thijs L, Staessen JA, Blankesteyn WM. Left Ventricular Dysfunction and CXCR3 Ligands in Hypertension: From Animal Experiments to a Population-Based Pilot Study. Monleon D, ed. *PLOS ONE*. 2015;10(10):e0141394. doi:10.1371/journal.pone.0141394
5. Claesson-Welsh L, Welsh M. VEGFA and tumour angiogenesis. *J Intern Med*. 2013;273(2):114-127. doi:10.1111/joim.12019
6. Yousefzadeh MJ, Schafer MJ, Noren Hooten N, et al. Circulating levels of monocyte chemoattractant protein-1 as a potential measure of biological age in mice and frailty in humans. *Aging Cell*. 2018;17(2):e12706. doi:10.1111/accel.12706
7. Raghu H, Lepus CM, Wang Q, et al. CCL2/CCR2, but not CCL5/CCR5, mediates monocyte recruitment, inflammation and cartilage destruction in osteoarthritis. *Ann Rheum Dis*. 2017;76(5):914-922. doi:10.1136/annrheumdis-2016-210426
8. Xu Z, Li J, Yang H, et al. Association of CCL2 Gene Variants with Osteoarthritis. *Arch Med Res*. 2019;50(3):86-90. doi:10.1016/j.arcmed.2019.05.014
9. Bose S, Cho J. Role of chemokine CCL2 and its receptor CCR2 in neurodegenerative diseases. *Arch Pharm Res*. 2013;36(9):1039-1050. doi:10.1007/s12272-013-0161-z
10. O'Connor T, Borsig L, Heikenwalder M. CCL2-CCR2 Signaling in Disease Pathogenesis. *Endocr Metab Immune Disord-Drug Targets*. 2015;15(2):105-118. doi:10.2174/1871530315666150316120920
11. Shin MS, Lee JS, Lee N, Lee WW, Kim SH, Kang I. Maintenance of CMV-specific CD8+ T cell responses and the relationship of IL-27 to IFN- $\gamma$  levels with aging. *Cytokine*. 2013;61(2):485-490. doi:10.1016/j.cyto.2012.11.024

12. Hoefler J, Luger M, Dal-Pont C, Culig Z, Schennach H, Jochberger S. The “Aging Factor” Eotaxin-1 (CCL11) Is Detectable in Transfusion Blood Products and Increases with the Donor’s Age. *Front Aging Neurosci.* 2017;9:402. doi:10.3389/fnagi.2017.00402
13. Villeda SA, Luo J, Mosher KI, et al. The ageing systemic milieu negatively regulates neurogenesis and cognitive function. *Nature.* 2011;477(7362):90-94. doi:10.1038/nature10357
14. Yang RC, Qu XY, Xiao SY, et al. Meningitic Escherichia coli-induced upregulation of PDGF-B and ICAM-1 aggravates blood-brain barrier disruption and neuroinflammatory response. *J Neuroinflammation.* 2019;16(1):101. doi:10.1186/s12974-019-1497-1
15. Han Y, You X, Xing W, Zhang Z, Zou W. Paracrine and endocrine actions of bone—the functions of secretory proteins from osteoblasts, osteocytes, and osteoclasts. *Bone Res.* 2018;6(1):16. doi:10.1038/s41413-018-0019-6
16. Fabbi M, Carbotti G, Ferrini S. Context-dependent role of IL-18 in cancer biology and counter-regulation by IL-18BP. *J Leukoc Biol.* 2015;97(4):665-675. doi:10.1189/jlb.5RU0714-360RR
17. Palma G, Barbieri A, Bimonte S, et al. Interleukin 18: Friend or foe in cancer. *Biochim Biophys Acta BBA - Rev Cancer.* 2013;1836(2):296-303. doi:10.1016/j.bbcan.2013.09.001
18. Esmailbeig M, Ghaderi A. Interleukin-18: a regulator of cancer and autoimmune diseases. *Eur Cytokine Netw.* 2017;28(4):127-140. doi:10.1684/ecn.2018.0401
19. Trøseid M, Seljeflot I, Arnesen H. The role of interleukin-18 in the metabolic syndrome. *Cardiovasc Diabetol.* 2010;9(1):11. doi:10.1186/1475-2840-9-11
20. Minciullo PL, Catalano A, Mandraffino G, et al. Inflammaging and Anti-Inflammaging: The Role of Cytokines in Extreme Longevity. *Arch Immunol Ther Exp (Warsz).* 2016;64(2):111-126. doi:10.1007/s00005-015-0377-3
21. Hartman J, Frishman WH. Inflammation and Atherosclerosis: A Review of the Role of Interleukin-6 in the Development of Atherosclerosis and the Potential for Targeted Drug Therapy. *Cardiol Rev.* 2014;22(3):147-151. doi:10.1097/CRD.0000000000000021
22. Michaud M, Balardy L, Moulis G, et al. Proinflammatory Cytokines, Aging, and Age-Related Diseases. *J Am Med Dir Assoc.* 2013;14(12):877-882. doi:10.1016/j.jamda.2013.05.009
